# Supplementary material
Source: PubMed Central journal article supplement (PMC3551351)

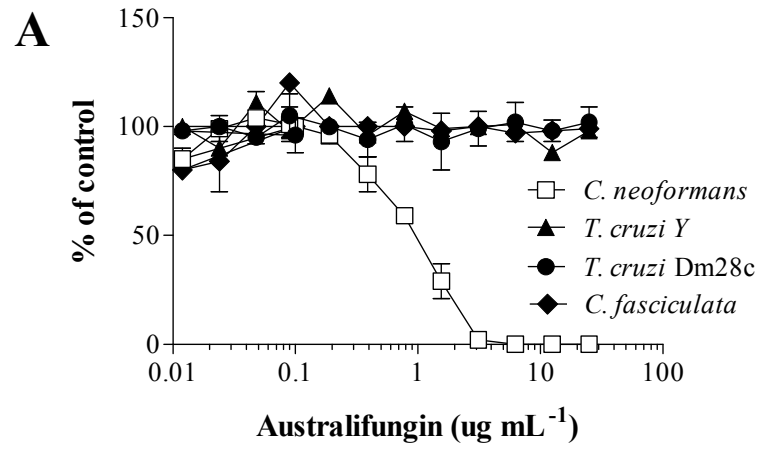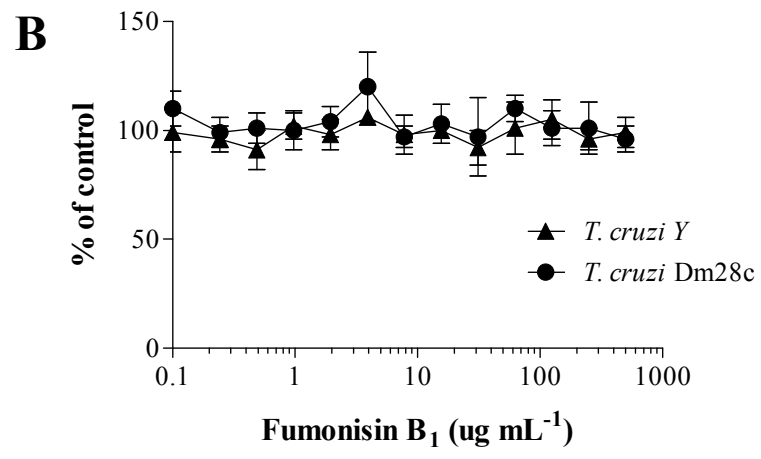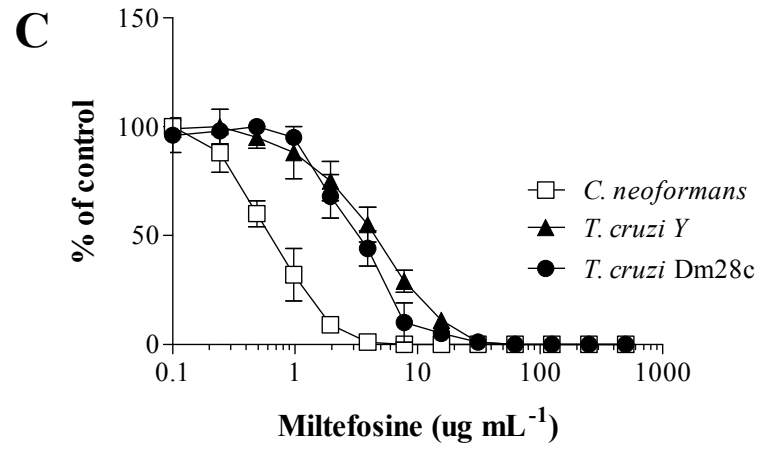

Supplement: NIHMS428826-supplement-01.pdf [file NIHMS428826-supplement-01.pdf]

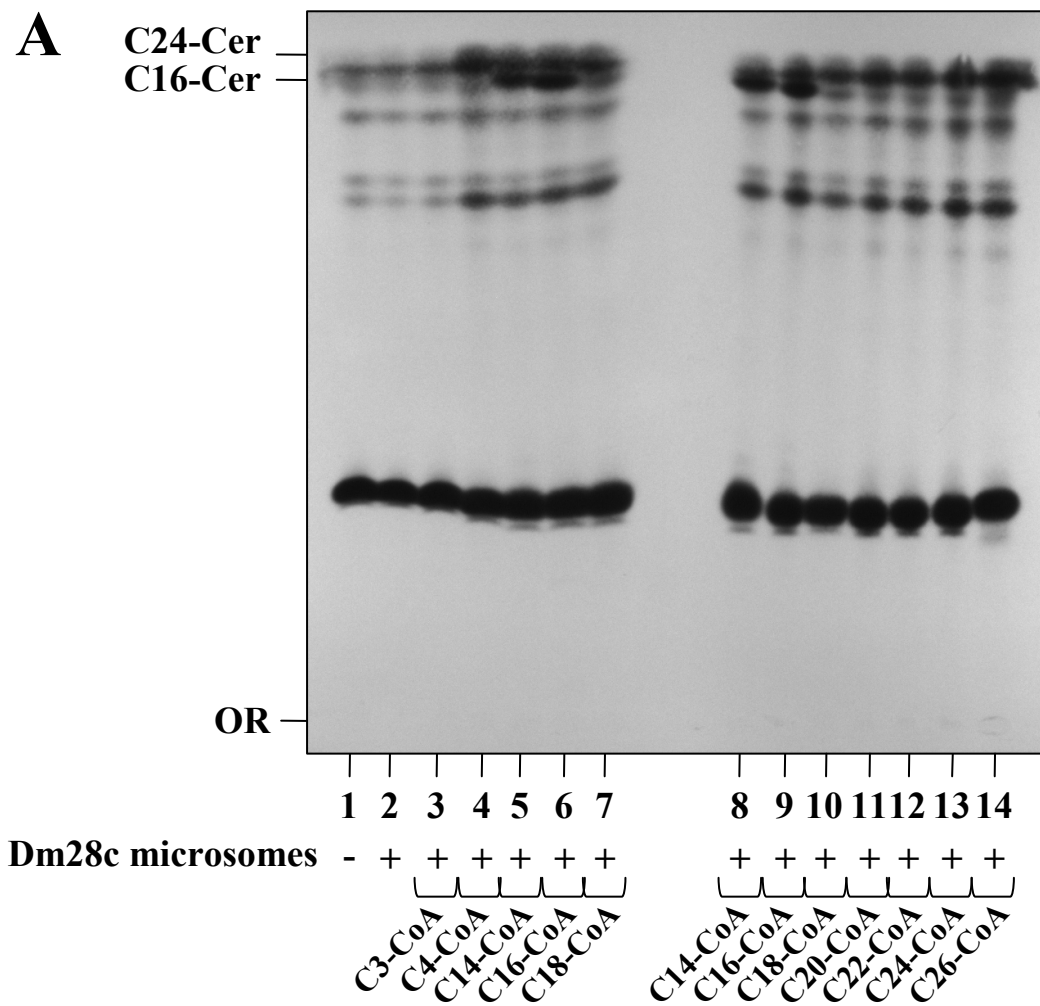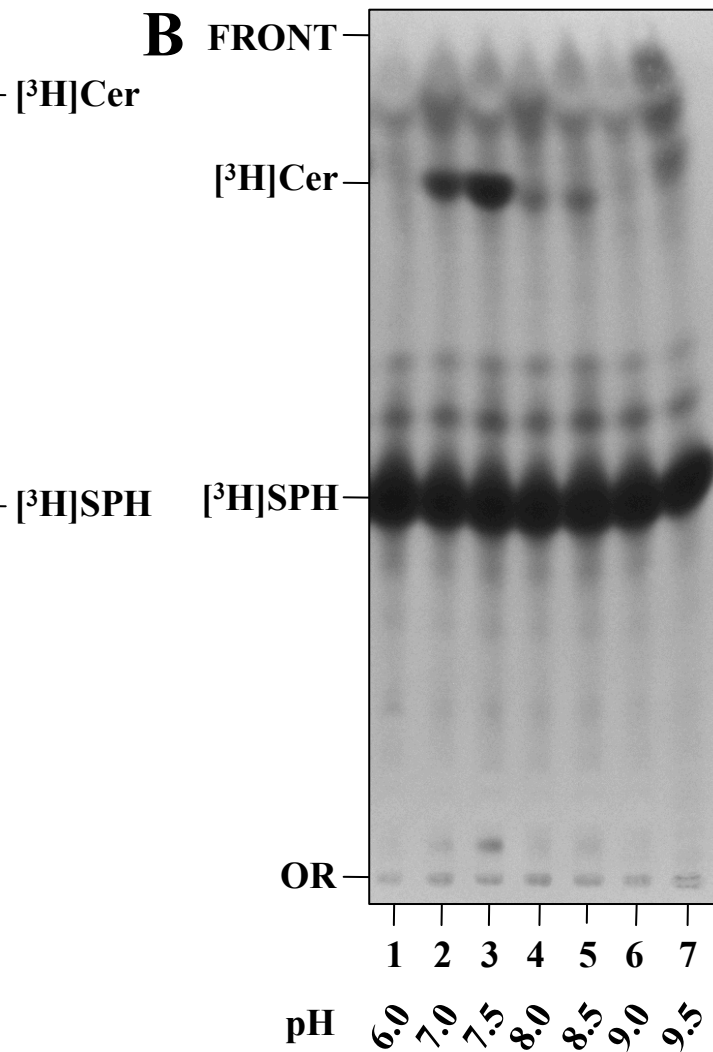

Supplement: NIHMS428826-supplement-03.pdf [file NIHMS428826-supplement-03.pdf]

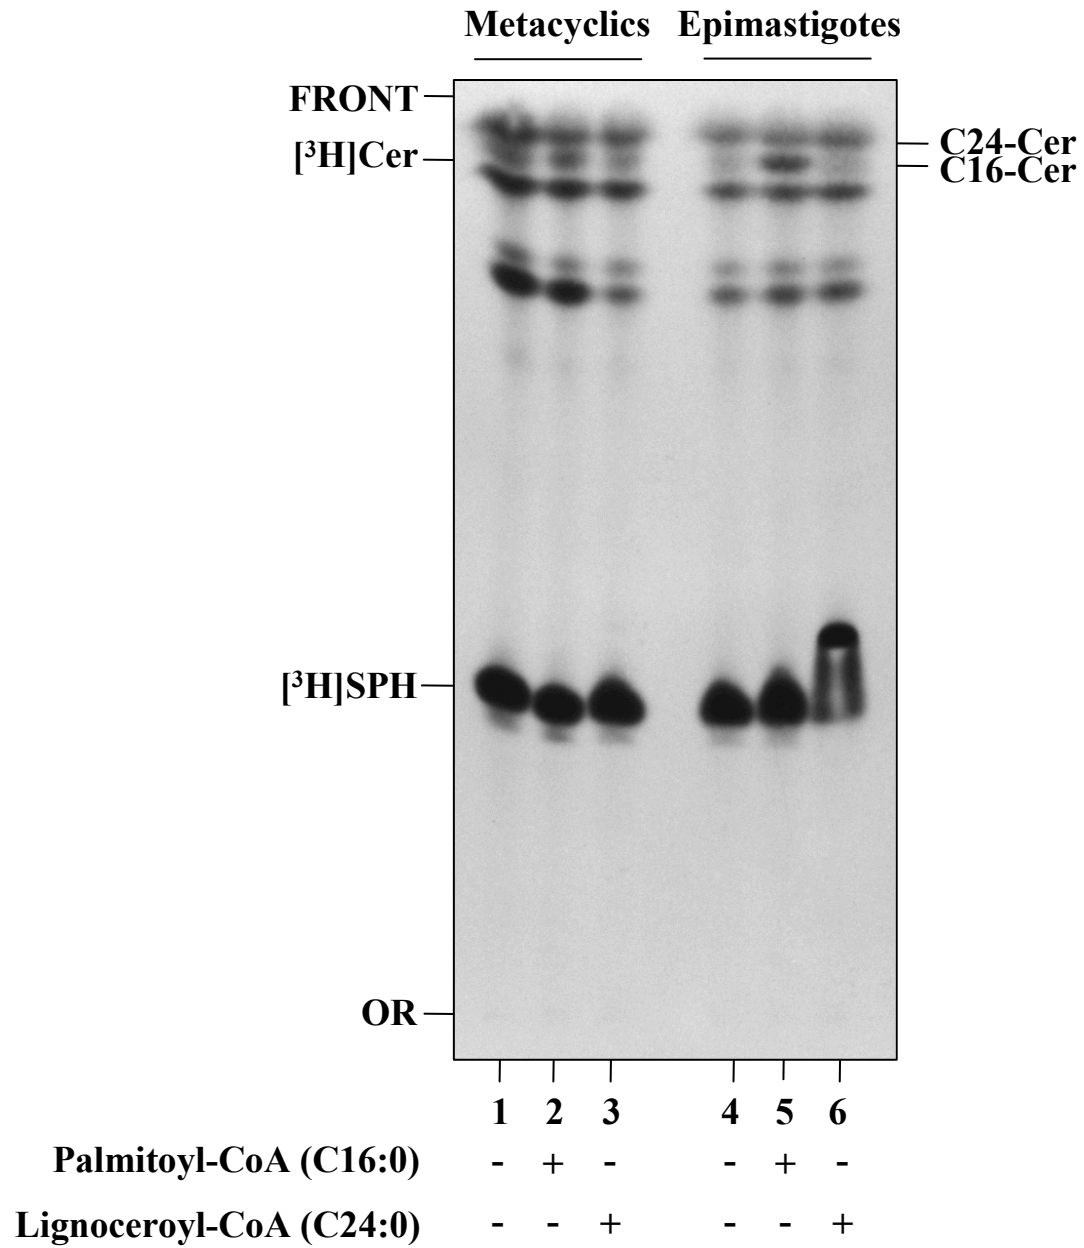

Supplement: NIHMS428826-supplement-04.pdf [file NIHMS428826-supplement-04.pdf]
